# Supplementary material for: The Impact of Live Commerce Service Quality on Repurchase Intention in China: The Mediating Role of Trust and Generational Differences Between Gen Z and Older Adults
Source: Research Square preprint supplement (doi:10.21203/rs.3.rs-7912069/v1), 2025-11-20
Supplement: Supplementary file 1 [file e7be1ca5af34f4273f8d737a.docx]

**AUTHOR INFORMATION FORM**

**Form 008**

**First Author**

| **S/No:** | **Parameters** | **Entries** |
| --- | --- | --- |
| **1** | **Name of First author** | **Chaoqun.He** |
| **2** | **D.O.B, Gender, Nationality**  **Profile Entries** | **Sep10,1986,Male,China** |
| **3** | **Education:**  **From Low to High** | **Bachelor of Business Administration, Chuzhou University, 2006-2010;**  **Master of Business Administration, Guilin University of Electronic Technology, 2017 - 2019;**  **Doctor of Philosophy in Business Administration, Lyceum University Of Philippines, 2024-present** |
| **4** | **Subject Specialization and skill for reviews** |  |
| **5** | **Professional Occupation**  **Student/Employee**  **Designation** | **Student,Lyceum University Of Philippine** |
| **6** | **Previous Publications**  **(If Any)**  **Title of Journal, Paper with ISSN NO:** | **Research on the correlation between the professionalism, credibility, and consumer purchase intention of internet celebrities**  **ISSN NO：2096-5559** |
| **7** | **Email Address**  **Primary and Secondary** | **[2023-1-02319@lpu.edu.ph](mailto:2023-1-02319@lpu.edu.ph)**  **375726328@qq.com** |
| **8** | **Contact No:**  **Primary and Secondary** | **86+15616901572**  **63+09541428159** |
| **9** | **Mailing Address** | **Wanhe Community, Dao County, Yongzhou City, Hunan Province, China** |
| **10** | **Affiliations with institutes or Departments** | **Claro M. Recto Academy of Advanced Studies，Lyceum of the Philippines University** |
| **11** | **Acknowledgment** |  |
| **12** | **Purpose of the Research** | **Academic Research** |

**Second Author**

| **S/No:** | **Parameters** | **Entries** |
| --- | --- | --- |
| **1** | **Name of Second author** |  |
| **2** | **D.O.B, Gender, Nationality**  **Profile Entries** |  |
| **3** | **Education:**  **From Low to High** |  |
| **4** | **Subject Specialization and skill for reviews** |  |
| **5** | **Professional Occupation**  **Student/Employee**  **Designation** |  |
| **6** | **Previous Publications**  **(If Any)**  **Title of Journal, Paper with ISSN NO:** |  |
| **7** | **Email Address**  **Primary and Secondary** |  |
| **8** | **Contact No:**  **Primary and Secondary** |  |
| **9** | **Mailing Address** |  |
| **10** | **Affiliations with institutes or Departments** |  |
| **11** | **Acknowledgment** |  |
| **12** | **Purpose of the Research** |  |

**Corresponding Author**

| **S/No:** | **Parameters** | **Entries** |
| --- | --- | --- |
| **1** | **Name of author** |  |
| **2** | **D.O.B, Gender, Nationality**  **Profile Entries** |  |
| **3** | **Education:**  **From Low to High** |  |
| **4** | **Subject Specialization and skill for reviews** |  |
| **5** | **Professional Occupation**  **Student/Employee**  **Designation** |  |
| **6** | **Previous Publications**  **(If Any)**  **Title of Journal, Paper with ISSN NO:** |  |
| **7** | **Email Address**  **Primary and Secondary** |  |
| **8** | **Contact No:**  **Primary and Secondary** |  |
| **9** | **Mailing Address** |  |
| **10** | **Affiliations with institutes or Departments** |  |
| **11** | **Acknowledgment** |  |
| **12** | **Purpose of the Research** |  |
